# Supplementary material for: One-step synthesis of Pt-decorated graphene–carbon nanotubes for the electrochemical sensing of dopamine, uric acid and ascorbic acid
Source: Royal Society of Chemistry journal article supplement (doi:10.1039/c4ay02487g), 2014-11-28
Supplement: c4ay02487g1.pdf [file c4ay02487g1.pdf]

# One-step synthesis of Pt-decorated graphene-carbon nanotube for electrochemical sensing of dopamine, uric acid and ascorbic acid

S. Ramakrishnan<sup>a,b</sup>, K. R Pradeep<sup>a</sup> A. Raghul<sup>a</sup> R. Senthil kumar<sup>a,b</sup>, Murali Rangarajan<sup>a,b</sup>

Nikhil K. Kothurkar<sup>\*a,b</sup>

<sup>a</sup>Center of Excellence in Advanced Materials and Green Technologies, Amrita Vishwa Vidyapeetham University, Coimbatore-641112

<sup>b</sup>Department of Chemical Engineering and Material Science, Amrita Vishwa Vidyapeetham University, Coimbatore-641112

## Analyte Levels in Real Samples

**Table S1: Comparison of the linear ranges and detection limits of the Pt-Gr-CNT/GCE sensing platform with the levels of ascorbic acid, dopamine and uric acid in blood and urine.**

| Analyte | Normal Levels<br>μM                                                              | Linear Range (μM)<br>(Pt-Gr-CNT/GCE ) | Detection limit in<br>buffer (μM) |
|---------|----------------------------------------------------------------------------------|---------------------------------------|-----------------------------------|
| AA      | <b>I</b> <sup>1</sup> : 3.29–10.67<br><b>II</b> <sup>1</sup> : 7–522             | 200–900                               | 50                                |
| DA      | <b>I</b> <sup>2</sup> : 0.000065–0.00039<br><b>II</b> <sup>2</sup> : 0.420–2.612 | 0.2–30                                | 0.01                              |
| UA      | <b>I</b> <sup>3</sup> : 80–440<br><b>II</b> <sup>4</sup> : 1480–4430             | 0.1–50                                | 0.1                               |

I: blood and II- Urine

## Calculation of the Surface Area of Pt-Gr-CNT/GCE and GCE

The electrochemical behavior of GCE and Pt-CNT-GR/GCE was studied using cyclic voltammetry in 1mM ferricyanide solution at a scan rate 50 mV/s. It was found that both electrodes displayed reversible behavior. Using a diffusion coefficient of  $6.3 \times 10^{-6} \text{ cm}^2/\text{s}$ <sup>5,6</sup>, the electroactive surface area was calculated from Randles-Sevcik equation given,

$$i_p = (2.69 \times 10^5) n^{3/2} D^{1/2} \nu^{1/2} AC \quad (1)$$

where n is the number of electrons, A is the electrode surface area, C is the concentration, D is the diffusion coefficient and V is the scan rate.

## Reference

1. D. Chamberlin and H. J. Perkin, *The American Journal of Digestive Diseases*, 1938, **5**, 493-497.
2. Georges Elhomsy and E. B. Staros, St Louis University School of Medicine, 2012.
3. J. Meschino, The Adëeva , The Natural choice of Healthcare 1996.
4. A. C. Poinier and N. A. Shadick, WebMD Medical Reference from Healthwise, 2012.
5. K. E. Heusler, *Berichte der Bunsengesellschaft für physikalische Chemie*, 1969, **73**, 1098-1098.
6. R. O. Kadara, N. Jenkinson and C. E. Banks, *Sensors and Actuators B: Chemical*, 2009, **138**, 556-562.
